# Supplementary material
Source: PubMed Central journal article supplement (PMC3031645)
Supplement: 69-s1.pdf [file 69-s1.pdf]

## Appendix

### Search strategy

#### Results

Embase 1980–present

1. MALIGNANT MESOTHELIOMA /OR MESOTHELIOMA /OR PLEURA MESOTHELIOMA
2. Mesothelioma ti,ab
3. 1 or 2
4. Lung resection/
5. Pneumonectomy ti,ab
6. Decortications ti, ab
7. Pleurectomy/
8. Pleurectomy ti,ab
9. Lung surgery/
10. Surgery or surgical ti,ab
11. 4 or 5 or 6 or 7 or 8 or 9
12. 3 and 11
13. 10 or 11
14. 3 and 13
15. 12 limit to Clinical queries treatment
16. 14 limit to Clinical queries treatment
17. 14 limit to Publication Types Report and clinical queries
18. 14 limit to Clinical queries treatment 1 term min difference

Medline 1950–present

1. MALIGNANT MESOTHELIOMA /OR MESOTHELIOMA /OR PLEURA MESOTHELIOMA
2. Mesothelioma ti,ab
3. 1 or 2
4. Pneumonectomy ti, ab
5. Decortications ti,ab
6. Pleurectomy ti,ab
7. Pneumonectomy/
8. Pulmonary surgical procedures/
9. 4 or 5 or 6 or 7 or 8
10. 3 and 9
11. 10 limit to publication types case reports or clinical trial, all or clinical trial, Phase I or clinical trial, Phase II or clinical trial, Phase III or clinical trial, Phase IV or clinical trial or Comparative study or controlled clinical trial or evaluation studies or meta-analysis or multi-center study or randomized controlled trial or research support or NIH, extramural or research support, NIH, intramural or research support, non-US Gov't or research support, US Gov't, non-PHS or research support, US Gov't, PHS.
